# Supplementary material for: Three-Dimensional Porous Ti3C2Tx-NiO Composite Electrodes with Enhanced Electrochemical Performance for Supercapacitors
Source: MDPI journal article supplement (doi:10.3390/ma12010188), 2019-01-08
Supplement: s1 [file s1]

# Supplementary Materials for

## Three-dimensional porous $Ti_3C_2T_x$ -NiO composite electrodes with enhanced electrochemical performance for supercapacitors

Kaicheng Zhang<sup>1</sup>, Guobing Ying<sup>1\*</sup>, Lu Liu<sup>1</sup>, Fengchen Ma<sup>1</sup>, Lin Su<sup>1</sup>, Chen Zhang<sup>1</sup>, Donghai Wu<sup>3</sup>, Xiang Wang<sup>2</sup>, Ying Zhou<sup>3</sup>

<sup>1</sup> Department of Materials Science and Engineering, College of Mechanics and Materials, Hohai University, Nanjing 211100, China

<sup>2</sup> Key Laboratory of Superlight Materials & Surface Technology (Harbin Engineering University), Ministry of Education, Harbin 150001, China

<sup>3</sup> Key Laboratory of Integrated Regulation and Resources Development of Shallow Lakes of Ministry of Education, College of Environment, Hohai University, Nanjing 210098, P.R.China

\* Correspondence: yinggb2010@126.com, yinggb001@hhu.edu.cn; Tel.: +86-25-83787027; Fax: +86-25-83786046

Academic Editor: name

Received: date; Accepted: date; Published: date

### Supporting Information

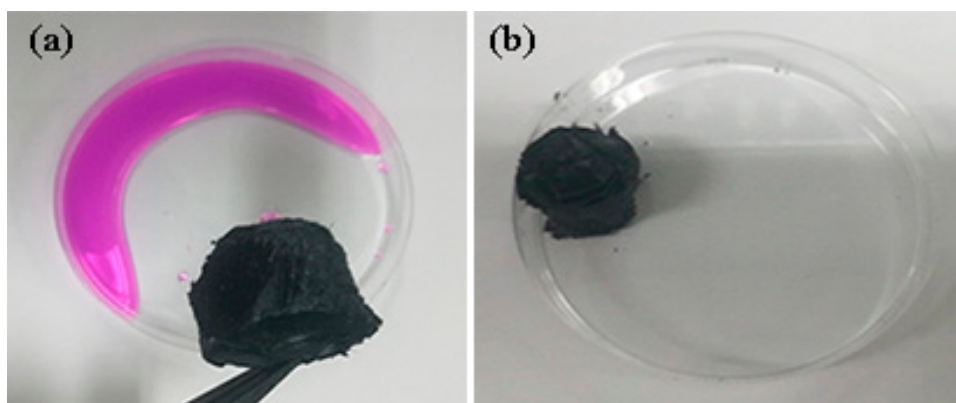

Fig. S1. The pictures for 3D porous  $Ti_3C_2T_x$  (a) before and (b) after absorbing water.

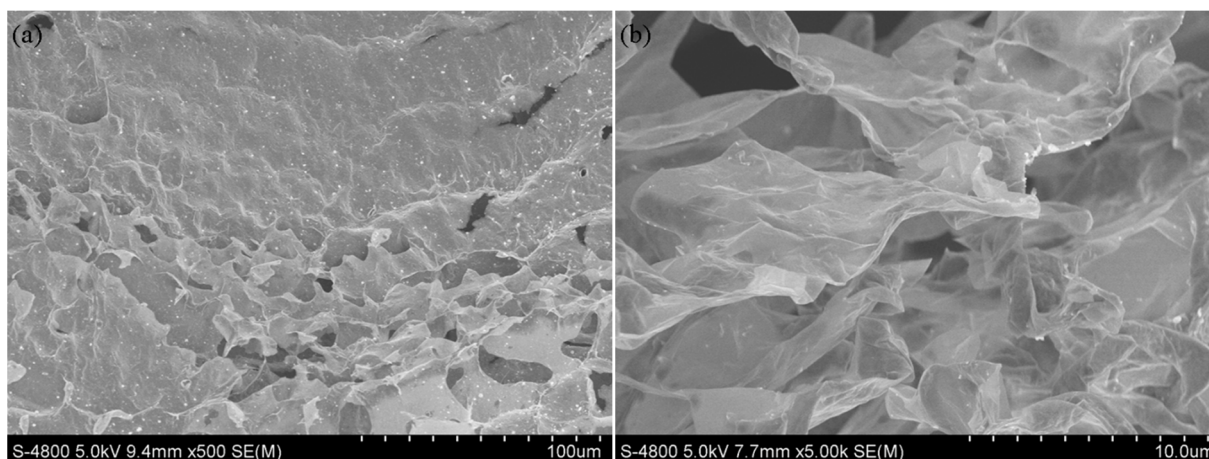

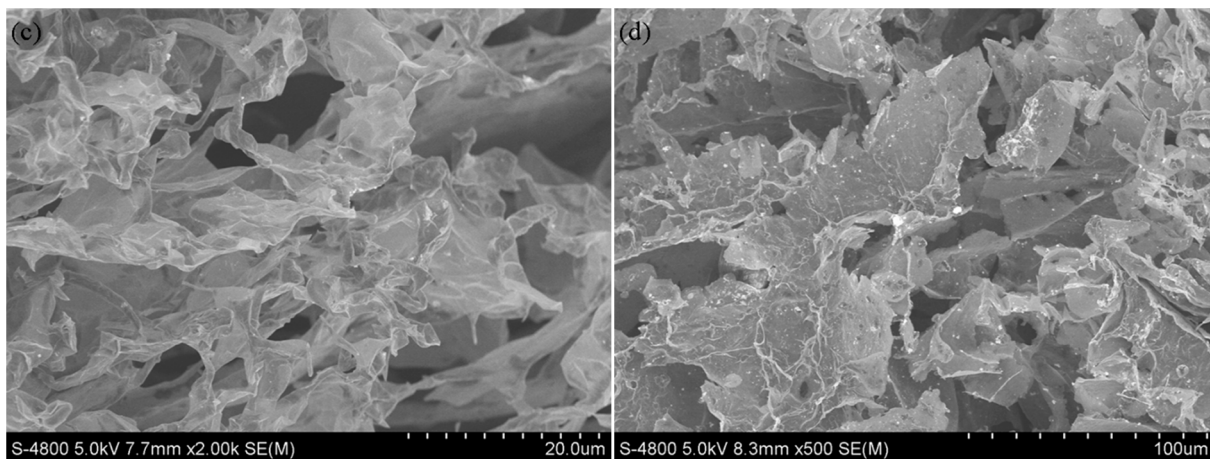

**Fig. S2.** SEM images of the (a) 3D porous  $Ti_3C_2T_x-NiO$  with initial ratio of 2:1, (b) 3D porous  $Ti_3C_2T_x-NiO$  with initial ratio of 1:1, (c) 3D porous  $Ti_3C_2T_x-NiO$  with initial ratio of 1:1, (d) 3D porous  $Ti_3C_2T_x-NiO$  with initial ratio of 1:2.

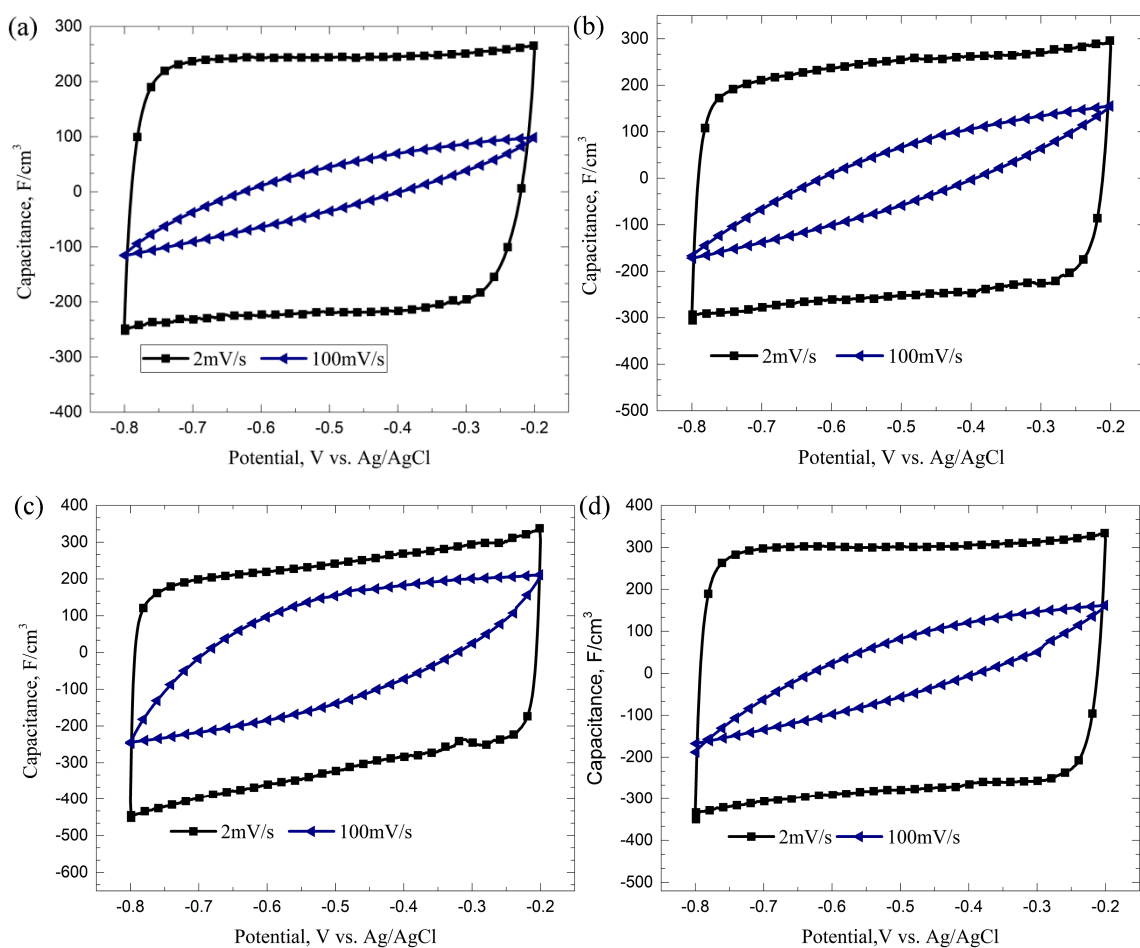

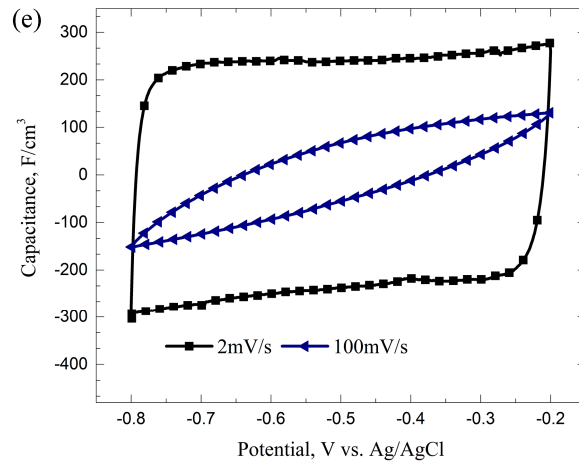

**Fig. S3.** CVs images of the (a) 3D porous  $Ti_3C_2T_x$  (b) 3D porous  $Ti_3C_2T_x-NiO$  with initial ratio of 4:1, (c) 3D porous  $Ti_3C_2T_x-NiO$  with initial ratio of 2:1, (d) 3D porous  $Ti_3C_2T_x-NiO$  with initial ratio of 1:1, (e) 3D porous  $Ti_3C_2T_x-NiO$  with initial ratio of 1:2.
